# Supplementary material
Source: ML conference proceedings conference paper supplement (https://openreview.net/forum?id=yGyYNoqtiW)

RSCUSUM: — Non-robust SCUSUM: — Changepoint: — Threshold: - -

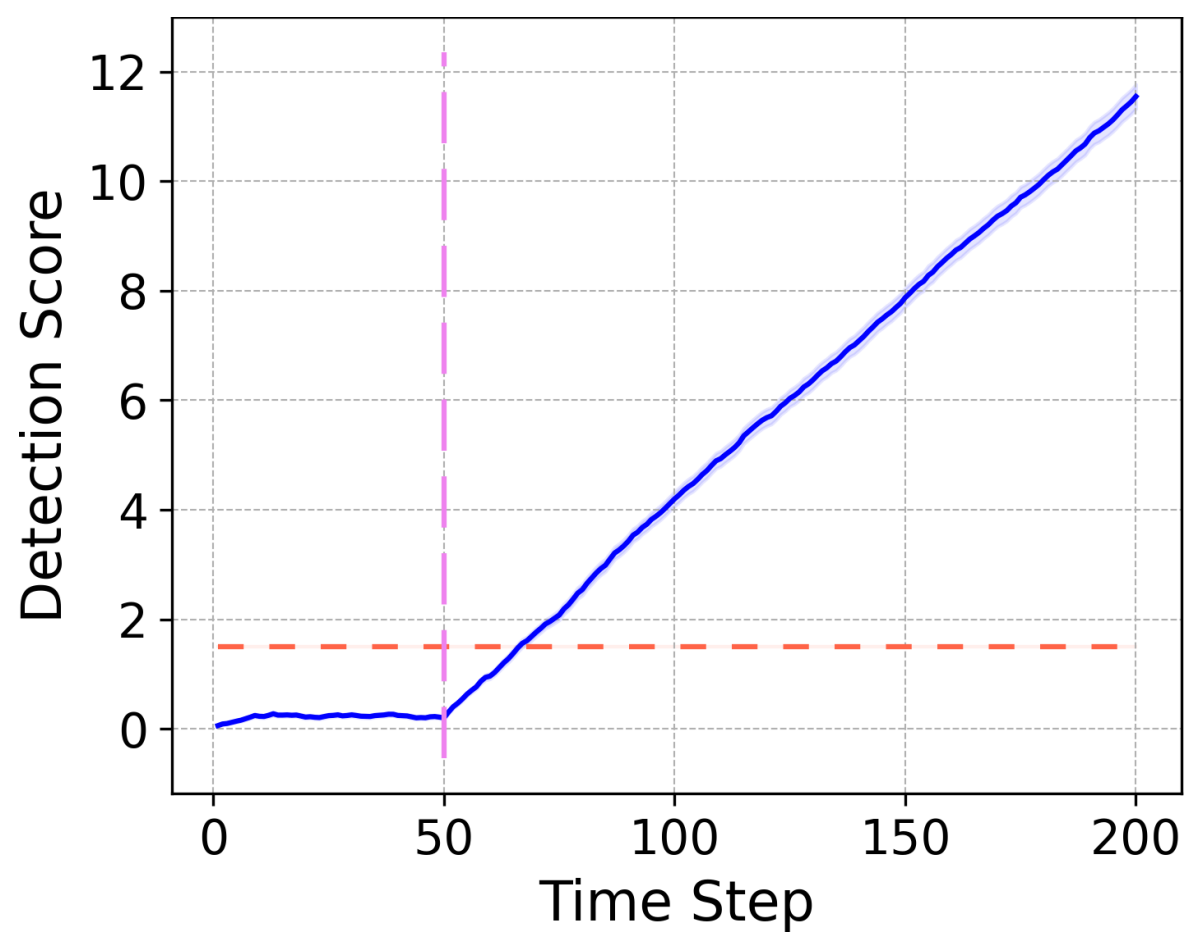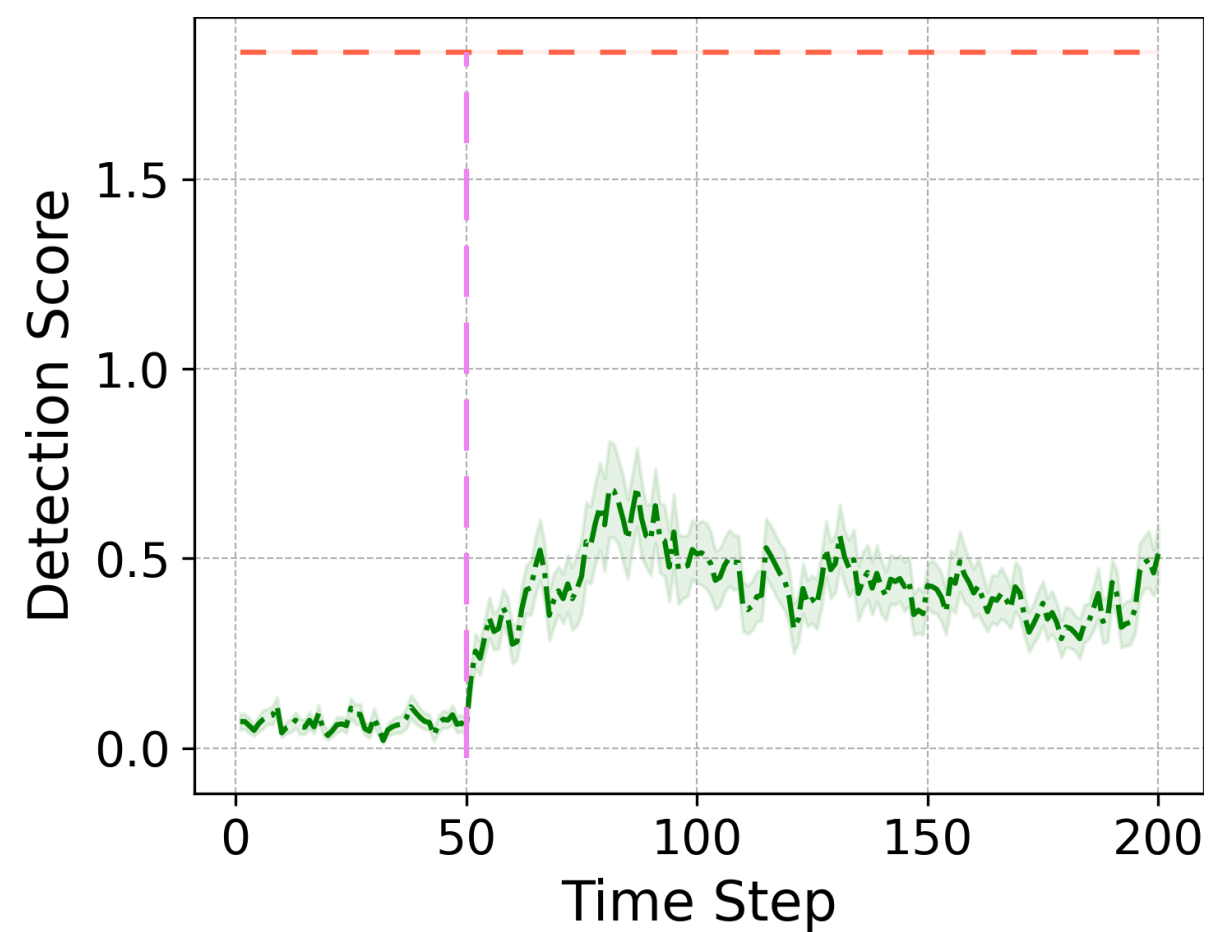

(a)  $MVN_m (\epsilon_\mu = 0.6)$

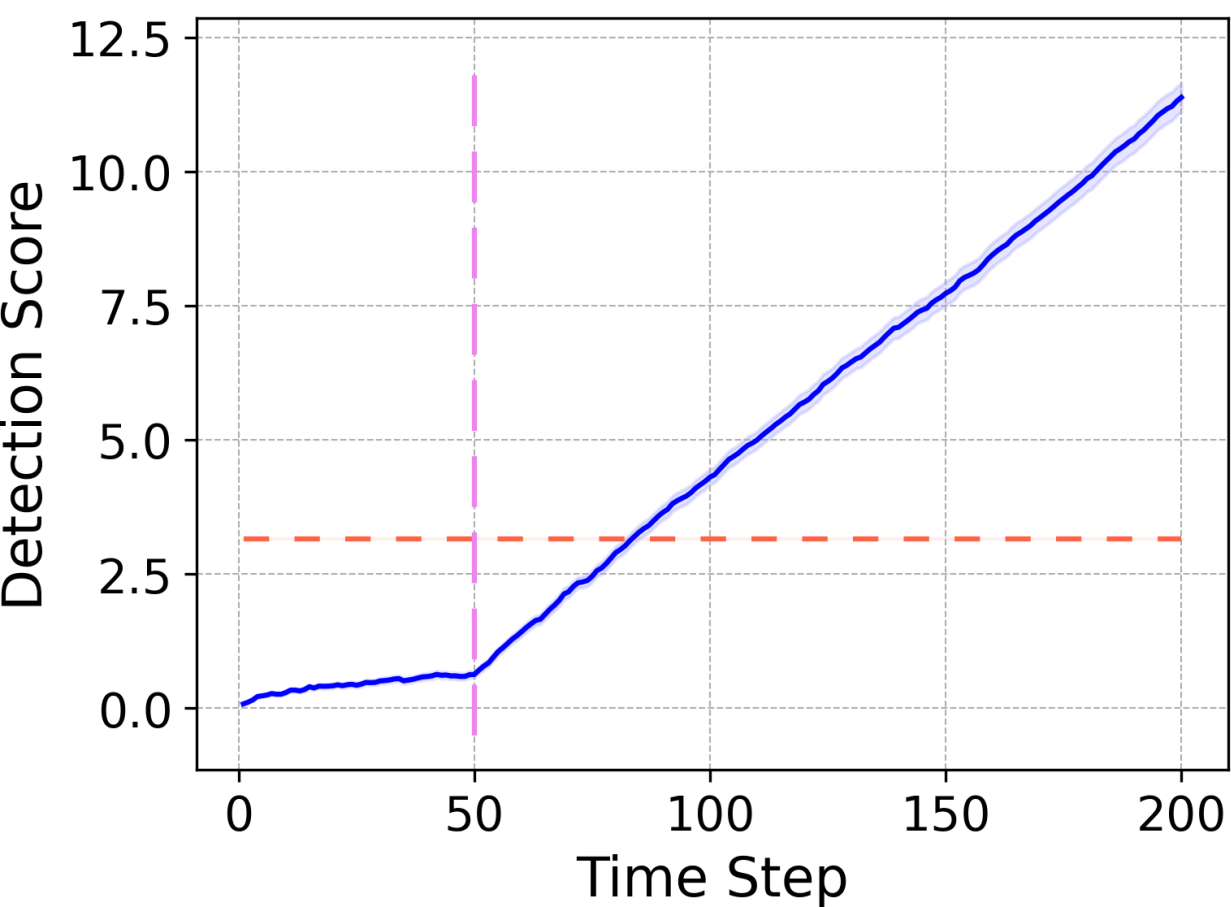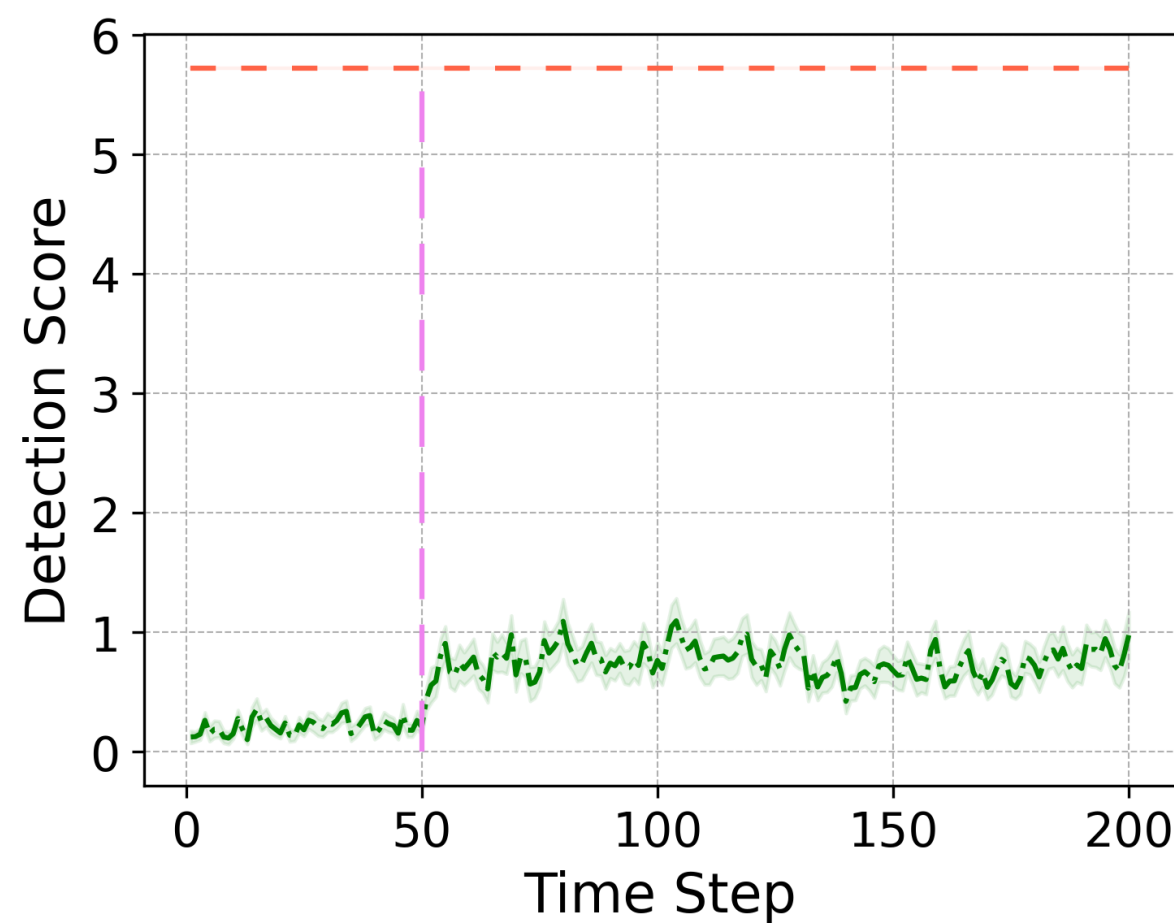

(b)  $RBM (\sigma_\epsilon = 0.002)$

Supplement: supplementary_material [file attachment]

$P_1$ : 
 $P_2$ : 
 $P_3$ : 
 $P_4$ : 

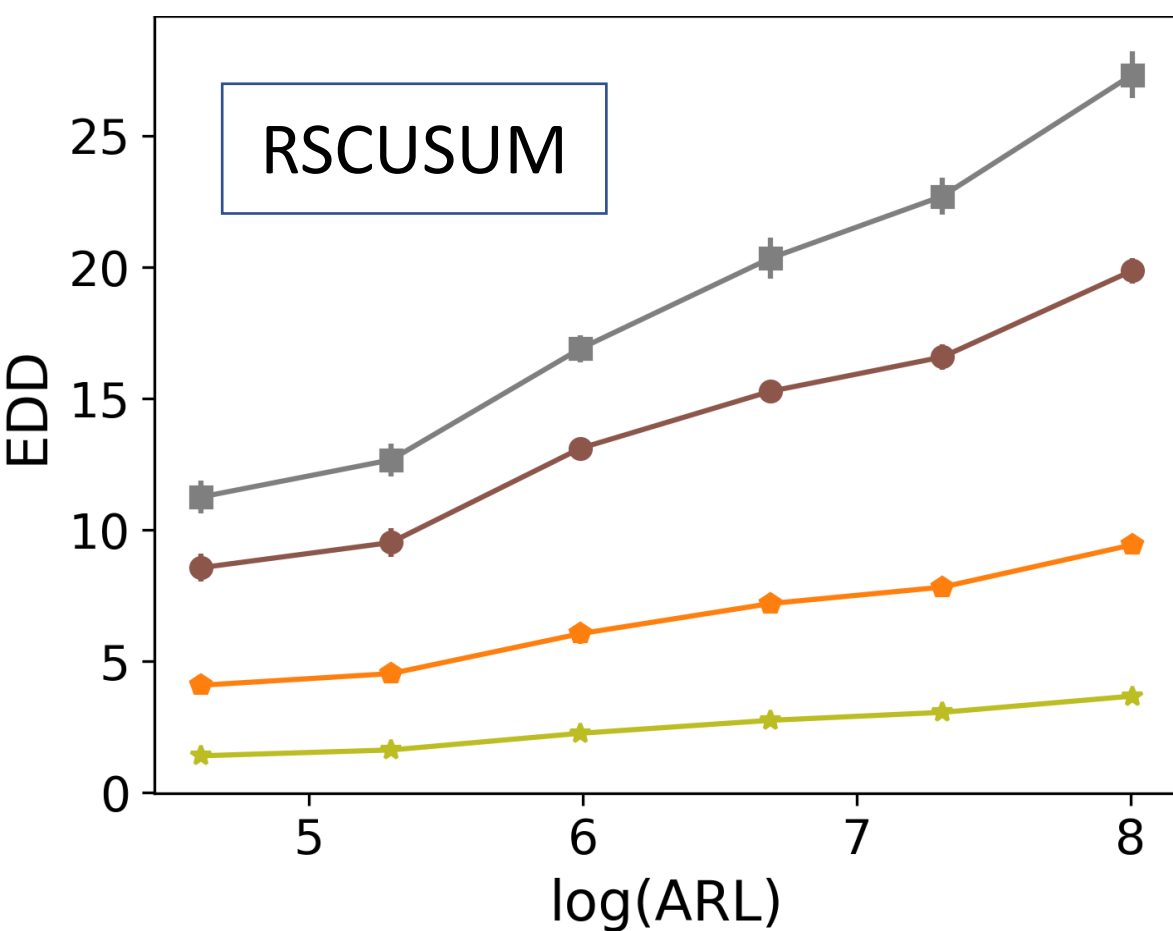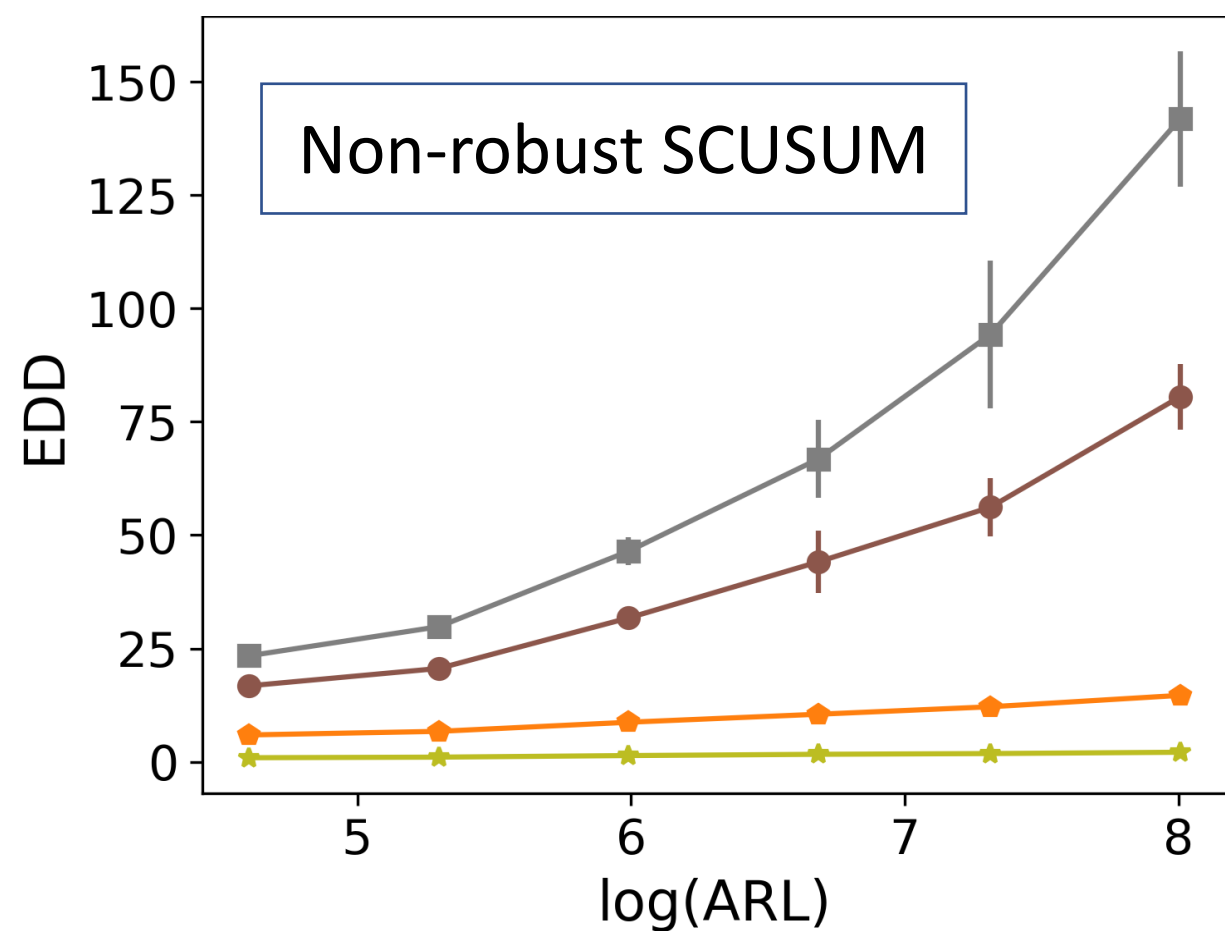

**(a)  $MVN_m$**

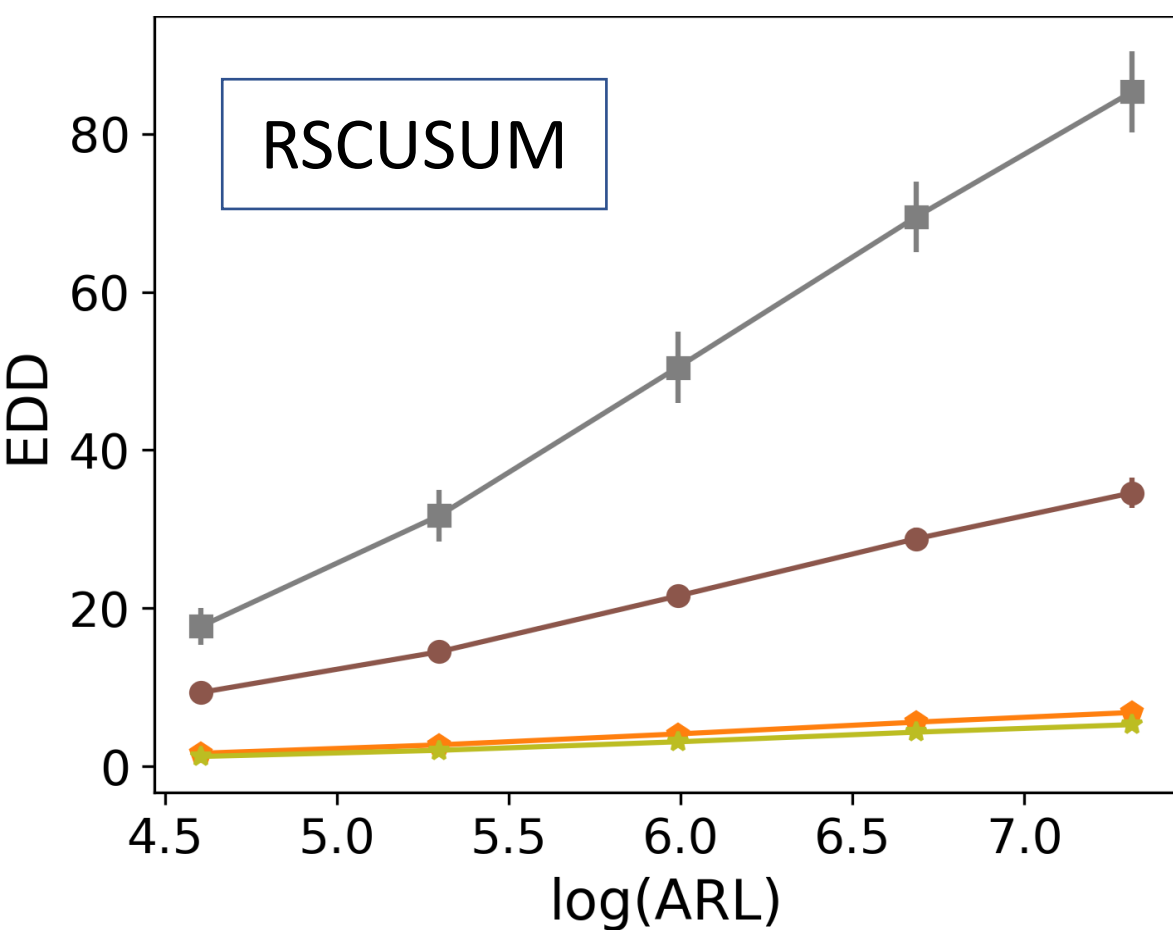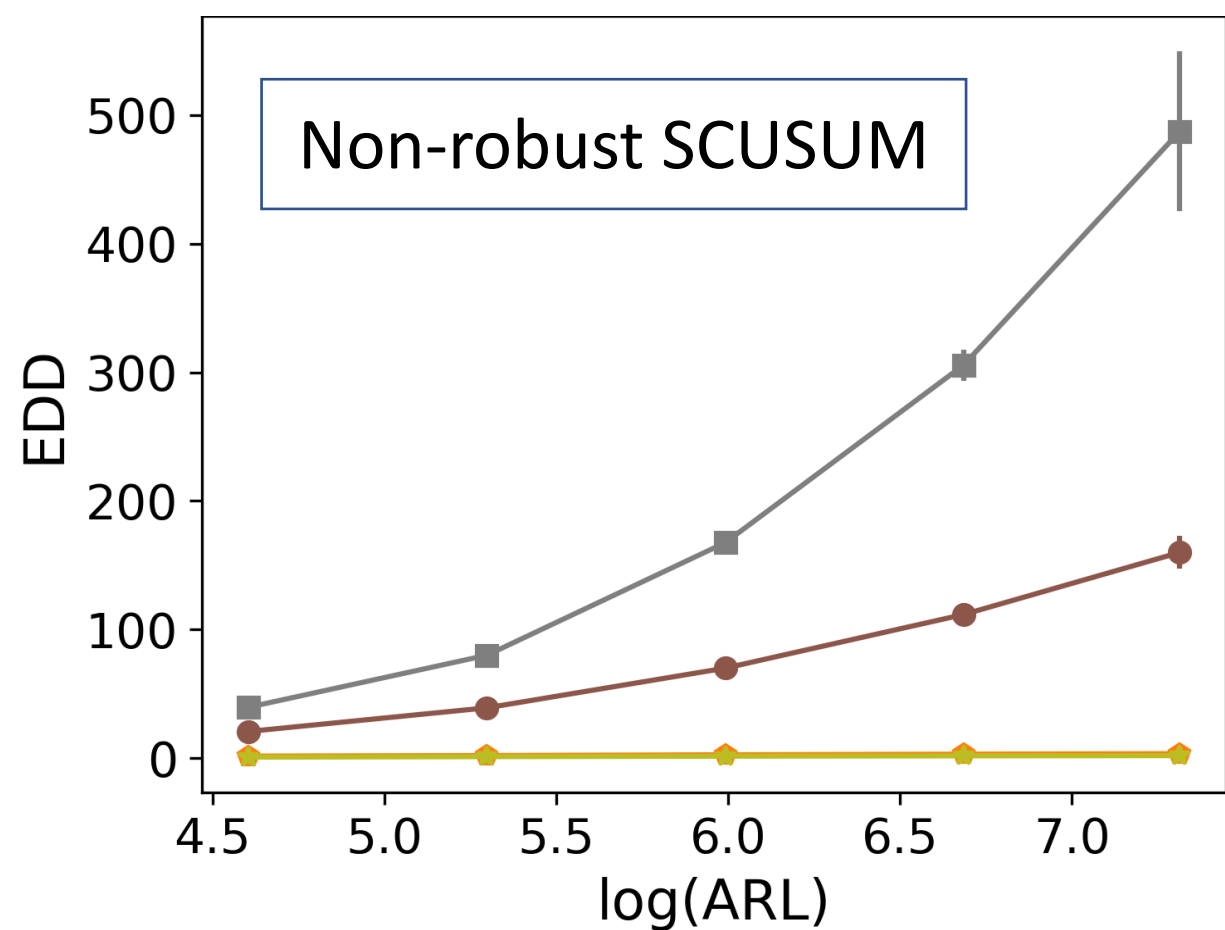

**(b) RBM**

Supplement: supplementary_material [file attachment]
